# Supplementary material for: Nanoparticle Delivery of Novel PDE4B Inhibitor for the Treatment of Alcoholic Liver Disease
Source: MDPI journal article supplement (doi:10.3390/pharmaceutics14091894), 2022-09-07
Supplement: s1 [file s1]

**Table S1.** Primers for quantitative RT-PCR

|                      |         |                                       |
|----------------------|---------|---------------------------------------|
| Mouse CPT-1a         | Forward | 5'-GCTGCACTCCTGGAAGAAGA-3'            |
|                      | Reverse | 5'-GGAGGGGTCCACTTTGGTAT-3'            |
| Mouse TNF- $\alpha$  | Forward | 5'-GCCTCTTCTCATTCTGCTTG-3'            |
|                      | Reverse | 5'-CTGATGAGAGGGAGGCCATT-3'            |
| Mouse SOD1           | Forward | 5'-AAGCGGTGAACCAGTTGTG-3'             |
|                      | Reverse | 5'-TCCAACATGCCTCTCTTCATC-3'           |
| Mouse SOD2           | Forward | 5'-GGCCAAGGGAGATGTTACAA-3'            |
|                      | Reverse | 5'-GCTTGATAGCCTCCAGCAAC-3'            |
| Mouse IL-1 $\beta$   | Forward | 5'-CTTTGAAGTTGACGGACCC-3'             |
|                      | Reverse | 5'-TGAGTGATACTGCCTGCCTG-3'            |
| Mouse PPAR- $\alpha$ | Forward | 5'-TCAGGGTACCACTACGGAGT-3'            |
|                      | Reverse | 5'-CTTGGCATTCTTCCAAAGCG-3'            |
| Mouse PGC-1 $\alpha$ | Forward | 5'-ACAGCTTTCTGGGTGGATTG-3'            |
|                      | Reverse | 5'-CGCTAGCAAGTTTGCCTCAT-3'            |
| Mouse ACOX1          | Forward | 5'-TCGAAGCCAGCGTTACGAG-3'             |
|                      | Reverse | 5'-ATCTCCGTCTGGGCGTAGG-3'             |
| Mouse PDE4B          | Forward | 5'-AGCTCATGACCCAGATAAGTG-3'           |
|                      | Reverse | 5'-GCAGCGTGCAGGCTGTTGTGA-3'           |
| Human Collagen I     | Forward | 5'-CCA TGC TGC CCT TTC TGC TCC TTT-3' |
|                      | Reverse | 5'-CAC TTG GGT GTT TGA GCA TTG CCT-3' |
| Human $\alpha$ -SMA  | Forward | 5'-CCGACCGAATGCAGAAG GA-3'            |
|                      | Reverse | 5'-ACAGAGTATTTGCGCTCCGAA-3'           |
| Human GAPDH          | Forward | 5'-TCG ACA GTC AGC CGC ATC TTC TTT-3' |
|                      | Reverse | 5'-ACC AAA TCC GTT GAC TCC GAC CTT-3' |
